# Supplementary material
Source: ML conference proceedings conference paper supplement (https://openreview.net/forum?id=uE40prCnsQ)
Supplement: supplementary_material [file mllm_testset.xlsx]

## Sheet: Sheet1
	task_name	img_url	query	dialog_data	app_label	MM-RR_label	NER_label	action_label	ACU_label
0	APP-Rec	./data/images/0a8bdf23b25a70f70c9fdc07ec66db79	识别图片是什么app的截图		拼多多
1	APP-Rec	./data/images/cfe77c2e313b6f8f003ad904f709a6fd	识别图片是什么app的截图		QQ
2	APP-Rec	./data/images/67d366962c0948f264038d4a8b21c60a	识别图片是什么app的截图		QQ
3	APP-Rec	./data/images/db7994dd3a593ec33591bf7e6df1934c	识别图片是什么app的截图		支付宝
4	APP-Rec	./data/images/ccad423d77249621008ee9bf1f449820	识别图片是什么app的截图		淘宝
5	APP-Rec	./data/images/8199a8ce33aac5e9adb34992a8cabe2f	识别图片是什么app的截图		淘宝
6	APP-Rec	./data/images/9d4be7161bd24e4267389c7d6b12c7f4	识别图片是什么app的截图		小红书
7	APP-Rec	./data/images/3fc5f5087349dbce70033ac33cae706f	识别图片是什么app的截图		微信
8	APP-Rec	./data/images/39baa2ac9d5be0fde4d16b769a5fe160	识别图片是什么app的截图		抖音
9	APP-Rec	./data/images/66bdbe7c38acbd2a17dece42a172265d	识别图片是什么app的截图		QQ
10	MM-RR	./data/images/8f0d01237b5250f4baaba9da9e30c6e2	他们两个在说什么？			1
11	MM-RR	./data/images/03a58182696682de12aa01b90e7b53b3	屏幕上这些鱼的颜色为什么这么鲜艳呢?			1
12	MM-RR	./data/images/6fb26e7dc3d02b1e9154e9897c28cdd7	图上的生物生活在哪里			1
13	MM-RR	./data/images/538effca79f1f8ce64e2c20ea667d707	动物最长能活多久			0
14	MM-RR	./data/images/e09035be56ab52be3e3dcf2d3635123f	图片上的动物生活在哪里			1
15	MM-RR	./data/images/4770d97f1c782916c8554b05c6a1ce8a	图上的书讲的啥			1
16	MM-RR	./data/images/2d7ff1c5bf7947ed5ed654dd154f41a3	图片上的鱼叫什么名字			1
17	MM-RR	./data/images/9eb17dd5cb9b19ee49614922f96c0fb7	我想去海洋生物馆去看鱼			0
18	MM-RR	./data/images/1738baf579abb53a722e88aa866d27c3	图里这个吃哪些肉类动物			1
19	MM-RR	./data/images/88e54f31d1ad30c466b3f0a9040e29b3	图上这个生物需要冬眠吗			1
20	ACU			[{"role": "user", "text": "我爷爷病危了"}, {"role": "assistant", "text": "不管发生什么还有我呢"}, {"role": "user", "text": "他今天摔了一跤中风了"}]					我爷爷今天摔了一跤中风了
21	ACU			[{"role": "user", "text": "刘轩是谁"}, {"role": "assistant", "text": "不认识刘轩"}, {"role": "user", "text": "那你还喜欢他吗"}]					那你还喜欢刘轩吗
22	ACU			[{"role": "user", "text": "我梦见了吴孟达"}, {"role": "assistant", "text": "嗯然后呢"}, {"role": "user", "text": "梦见他抱着别人"}]					梦见吴孟达抱着别人
23	ACU			[{"role": "user", "text": "那你喜欢王源吗"}, {"role": "assistant", "text": "原创歌手王源"}, {"role": "user", "text": "那你会模仿他说话吗"}]					那你会模仿王源说话吗
24	ACU			[{"role": "user", "text": "我梦见邢其毅先生了"}, {"role": "assistant", "text": "这样啊我知道了所以当时做了什么呢"}, {"role": "user", "text": "梦见他在给我们讲课"}]					梦见邢其毅先生在给我们讲课
25	ACU			[{"role": "user", "text": "因为易烊千玺"}, {"role": "assistant", "text": "千千声音真好听"}, {"role": "user", "text": "我更喜欢他性格"}]					我更喜欢易烊千玺性格
26	ACU			[{"role": "user", "text": "最近想学个乐器学啥好咧"}, {"role": "assistant", "text": "吉他"}, {"role": "user", "text": "这乐器的声音听起来很舒服哇"}]					吉他的声音听起来很舒服哇
27	ACU			[{"role": "user", "text": "我想你了"}, {"role": "assistant", "text": "别这么说我怕被你女朋友误会啊"}, {"role": "user", "text": "不会被她误会的"}]					不会被我女朋友误会的
28	ACU			[{"role": "user", "text": "你看过火影吗"}, {"role": "assistant", "text": "火影忍者大结局"}, {"role": "user", "text": "这你都看过啊"}]					火影忍者大结局你都看过啊
29	ACU			[{"role": "user", "text": "我是双鱼座的"}, {"role": "assistant", "text": "哦听说angelababy也是双鱼座的呢"}, {"role": "user", "text": "是吗可是我不喜欢她"}]					是吗可是我不喜欢angelababy
30	MM-NER	./data/images/4b870cb72888f5060e73bb9d115e5476					{"时间": [], "地点": [], "人名": ["小兰", "小军", "大壮", "甜甜", "小天", "小花", "小明"], "电话号码": [], "快递单号": [], "航班号": [], "火车班次": []}
31	MM-NER	./data/images/e0a28e81ff696cd6e3df02a64974a091					{"时间": ["08:30", "06:30", "07:10", "07:50", "07:55", "08:50", "09:30", "08:36", "07:02", "08:14", "07:04", "09:37", "08:33"], "地点": [], "人名": [], "电话号码": [], "快递单号": [], "航班号": ["MH370", "VA5542", "CA822", "CA3008", "AB4062", "LH720"], "火车班次": []}
32	MM-NER	./data/images/e5bfc0fb0c425e8172b341f9e047c1f4					{"时间": ["03-22 周二", "13:10", "15:05"], "地点": ["昆明", "广州", "长水机场", "白云机场T1"], "人名": [], "电话号码": [], "快递单号": [], "航班号": ["MU5735"], "火车班次": []}
33	MM-NER	./data/images/2655038e6a357bd4420e76399d021afd					{"时间": [], "地点": ["长城"], "人名": [], "电话号码": [], "快递单号": [], "航班号": [], "火车班次": []}
34	MM-NER	./data/images/85ff5dbfc9d6d731e07167c4b5066af3					{"时间": [], "地点": ["三乐福超市"], "人名": [], "电话号码": [], "快递单号": [], "航班号": [], "火车班次": []}
35	MM-NER	./data/images/e584191917c14c28181fed697a21a0bd					{"时间": [], "地点": [], "人名": [], "电话号码": ["021-12345678"], "快递单号": [], "航班号": [], "火车班次": []}
36	MM-NER	./data/images/37846ae0f33ce4a32e030d91cebc1e9b					{"时间": ["七点半"], "地点": [], "人名": [], "电话号码": [], "快递单号": [], "航班号": [], "火车班次": []}
37	MM-NER	./data/images/2ea06cc9821345bfb6b1165b0f020341					{"时间": ["19JUL"], "地点": [], "人名": [], "电话号码": [], "快递单号": [], "航班号": ["MU5703", "CZ9603"], "火车班次": []}
38	MM-NER	./data/images/defa68807c5a2ccf75b42cdb5d1cb01c					{"时间": [], "地点": [], "人名": ["陈雅雅"], "电话号码": [], "快递单号": [], "航班号": [], "火车班次": []}
39	MM-NER	./data/images/bb5dcd8164e05761e7ccb4bb95145be1					{"时间": [], "地点": ["厦门", "洛杉矶", "温哥华", "阿姆斯特丹", "悉尼", "墨尔本", "越南河内"], "人名": [], "电话号码": [], "快递单号": [], "航班号": ["23:30-21:00洛杉矶", "洛杉矶00:05-06:25厦门", "13:25-08:35温哥华", "温哥华01:20-06:05厦门", "厦门11:10-15:45阿姆", "阿姆09:10-13:20厦门", "22:00-10:15+1悉尼", "悉尼12:15-18:30厦门", "22:00-10:35+1墨尔本", "墨尔本02:10-08:35厦门"], "火车班次": []}
40	Mobile-FC			[{"text": "定一个早上10:00的闹钟。", "role": "user", "role_action": "create_alarm"}, {"role": "assistant", "action": "create_alarm(time=早上10:00)", "text": "已设置今天上午 10 点的闹钟，我会在 7 小时 19 分钟后叫你，就用温柔的梦来把疲倦的生活治愈。"}, {"text": "19:42的闹钟", "role": "user", "role_action": "create_alarm"}, {"role": "assistant", "action": "create_alarm(time=19:42)", "text": ""}, {"text": "03:00的闹钟", "role": "user", "role_action": "cre…			{}	create_alarm(time=早上10:00)||create_alarm(time=19:42)||create_alarm(time=03:00)
41	Mobile-FC			[{"text": "山东今天天气怎么样？", "role": "user", "role_action": "get_weather_overview"}, {"role": "assistant", "action": "get_weather_overview(location=山东,time=今天)", "text": "因无法获取你的位置信息，请说出你想查询的城市名？"}, {"text": "今儿上午呢？", "role": "user", "role_action": "get_weather_overview"}, {"role": "assistant", "action": "get_weather_overview(location=山东,time=今儿上午)", "text": "仅支持未来24小时内的时段气象，济南今天阴天，气温22度到30度，比双流区低5度，空…			{}	get_weather_overview(location=山东,time=今天)||get_weather_overview(location=山东,time=今儿上午)||get_weather_overview(location=山东芝罘区,time=今儿上午)||get_weather_overview(location=陕西延安延长县,time=今儿上午)
42	Mobile-FC			[{"text": "计时30分钟。", "role": "user", "role_action": "create_countdown"}, {"role": "assistant", "action": "create_countdown(time_span=30分钟)", "text": "好的"}, {"text": "计时21分钟", "role": "user", "role_action": "create_countdown"}, {"role": "assistant", "action": "create_countdown(time_span=21分钟)", "text": "创建倒计时已执行"}, {"text": "计时36分钟", "role": "user", "role_action": "create_countdown"}, {"role": "as…			{}	create_countdown(time_span=30分钟)||create_countdown(time_span=21分钟)||create_countdown(time_span=36分钟)||cancel_countdown()||cancel_countdown()
43	Mobile-FC			[{"text": "现在体感温度有多少？", "role": "user", "role_action": "get_apparent_temperature"}, {"role": "assistant", "action": "get_apparent_temperature(time=现在)", "text": "苏州吴江区现在的体感温度是 41度"}, {"text": "今儿晚上呢？", "role": "user", "role_action": "get_apparent_temperature"}, {"role": "assistant", "action": "get_apparent_temperature(time=今儿晚上)", "text": "因定位服务关闭无法获取你的位置信息，请说出你想查询的城市名？"}, {"text": "今天晚上呢？", "rol…			{}	get_apparent_temperature(time=现在)||get_apparent_temperature(time=今儿晚上)||get_apparent_temperature(time=今天晚上)||get_apparent_temperature(time=今晚)
44	Mobile-FC			[{"text": "今天慈溪气温多少度？", "role": "user", "role_action": "get_temperature"}, {"role": "assistant", "action": "get_temperature(location=慈溪,time=今天)", "text": "宁波慈溪今天气温28度到39度，比怀远县高4度，现在气温37度穿衣建议：建议您今天穿一件薄款T恤和一条长裤，以应对较高的气温。出行建议：驾车出行请注意防晒，并保持车速稳定，避免在高温时段出行。运动建议：适合户外运动，请选择早晨或傍晚时段，避免中午炎炎烈日。注意事项：慈溪今天空气质量良好，请放心出行和运动，但需注意防晒。"}, {"text": "明上午呢？", "role": "user", "role_action": "get_temperature"}, {"role": "…			{}	get_temperature(location=慈溪,time=今天)||get_temperature(location=慈溪,time=明上午)||get_temperature(location=江干区,time=明上午)||get_temperature(location=广东省珠海香洲,time=明上午)
45	Mobile-FC			[{"text": "倒计时10分钟", "role": "user", "role_action": "create_countdown"}, {"role": "assistant", "action": "create_countdown(time_span=10分钟)", "text": "好的"}, {"text": "计时46分钟", "role": "user", "role_action": "create_countdown"}, {"role": "assistant", "action": "create_countdown(time_span=46分钟)", "text": "创建倒计时已执行"}, {"text": "计时56分钟", "role": "user", "role_action": "create_countdown"}, {"role": "as…			{}	create_countdown(time_span=10分钟)||create_countdown(time_span=46分钟)||create_countdown(time_span=56分钟)||cancel_countdown()||cancel_countdown()
46	Mobile-FC			[{"text": "虎门地铁东站去大梅山深圳大梅山路线怎么走？", "role": "user", "role_action": "route_query"}, {"role": "assistant", "action": "route_query(role_location=虎门地铁东站,to_location=大梅山深圳大梅山)", "text": "好的"}, {"text": "从明山区出发", "role": "user", "role_action": "route_query"}, {"role": "assistant", "action": "route_query(role_location=明山区,to_location=大梅山深圳大梅山)", "text": ""}, {"text": "到綦江区", "role": "user", "role_action"…			{}	route_query(from_location=虎门地铁东站,to_location=大梅山深圳大梅山)||route_query(from_location=明山区,to_location=大梅山深圳大梅山)||route_query(from_location=明山区,to_location=綦江区)||route_query(from_location=明山区,to_location=綦江区,travel_mode=步行)||route_query(from_location=明山区,to_location=綦江区,travel_mode=步行,user_preference=时间最短)
47	Mobile-FC			[{"text": "把那个5:30的闹钟改成5:00。", "role": "user", "role_action": "modify_alarm_time"}, {"role": "assistant", "action": "modify_alarm_time(time=5:30,update_time=5:00)", "text": "这是一个重复闹钟，确认要修改吗？"}, {"text": "改到14:56", "role": "user", "role_action": "modify_alarm_time"}, {"role": "assistant", "action": "modify_alarm_time(time=5:00,update_time=14:56)", "text": ""}, {"text": "改到17:14", "role": "user", "…			{}	modify_alarm_time(time=5:30,update_time=5:00)||modify_alarm_time(time=5:00,update_time=14:56)||modify_alarm_time(time=14:56,update_time=17:14)||modify_alarm_time(time=17:14,update_time=09:55)
48	Mobile-FC			[{"text": "附近的小笼包。", "role": "user", "role_action": "nearby_search_without_conditions"}, {"role": "assistant", "action": "nearby_search_without_conditions(query_keyword=小笼包)", "text": "# 为您找到以下结果为你推荐以下地点"}, {"text": "主题公园", "role": "user", "role_action": "nearby_search_without_conditions"}, {"role": "assistant", "action": "nearby_search_without_conditions(query_keyword=主题公园)", "text": "回复这个问题需要获取…			{}	nearby_search_without_conditions(query_keyword=小笼包)||nearby_search_without_conditions(query_keyword=主题公园)||nearby_search_without_conditions(query_keyword=车站)||nearby_search_without_conditions(query_keyword=高尔夫球场)
49	Mobile-FC			[{"text": "麻烦设个闹钟", "role": "user", "role_action": "create_alarm"}, {"role": "assistant", "action": "create_alarm()", "text": "设置几点的？"}, {"text": "06:55", "role": "user", "role_action": "create_alarm"}, {"role": "assistant", "action": "create_alarm(time=06:55)", "text": ""}, {"text": "改到17:13", "role": "user", "role_action": "modify_alarm_time"}, {"role": "assistant", "action": "modify_alarm_time…			{}	create_alarm()||create_alarm(time=06:55)||modify_alarm_time(time=06:55,update_time=17:13)
